# Supplementary material for: High mechanical strength and broad optical absorption in underexplored group IV nitride chalcogenides
Source: Royal Society of Chemistry journal article supplement (doi:10.1039/d0cc04123h), 2020-01-01
Supplement: d0cc04123h1.pdf [file d0cc04123h1.pdf]

## Supplementary file

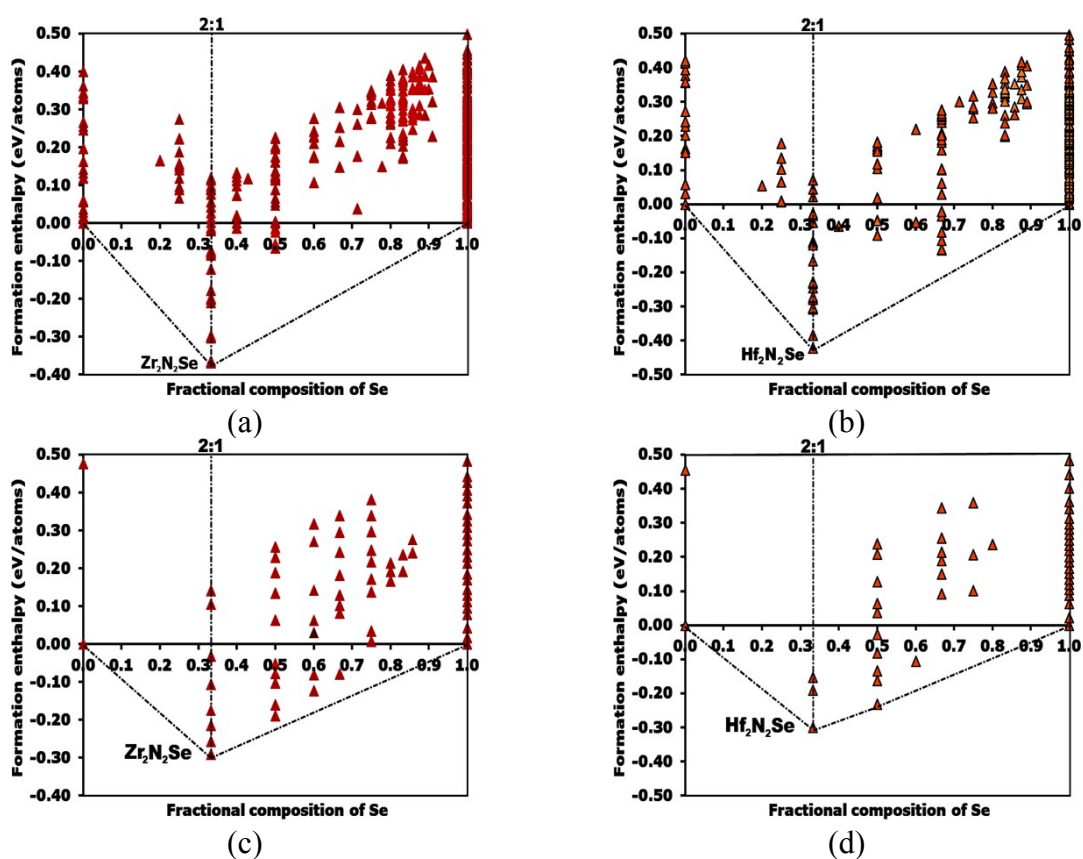

**S1** Convex hull plot for (a)  $P\bar{3}m1$ - $Zr_2N_2Se$  and (b)  $P\bar{3}m1$ - $Hf_2N_2Se$  phases, (c)  $P1m1$ - $Zr_2N_2Se$  and (d)  $C2/m$ - $Hf_2N_2Se$  monolayers.

**T1** Calculated structural data for energetically stable (a)  $\alpha$ - $Zr_2N_2Se$  and (b)  $\alpha$ - $Hf_2N_2Se$  phases. Top view of (c)  $P1m1$ - $Zr_2N_2Se$  and (d)  $C2/m$ - $Hf_2N_2Se$  monolayers. Red, brown, blue and yellow spheres indicate Zr, Hf, Se and N atoms, respectively.

| Phase                 | Unit cell                                                                           | Lattice constants / $\text{\AA}$ |       |       | Atomic Wyckoff positions                                                                           |
|-----------------------|-------------------------------------------------------------------------------------|----------------------------------|-------|-------|----------------------------------------------------------------------------------------------------|
|                       |                                                                                     | $a$                              | $b$   | $c$   |                                                                                                    |
| $Zr_2N_2Se$<br>SG 164 | 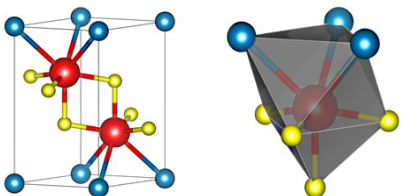 | 3.659                            | 3.659 | 6.687 | Zr (0.33333, 0.66667, 0.30472)<br>N (0.33333, 0.66667, -0.36850)<br>Se (0.00000, 0.00000, 0.00000) |
| $Hf_2N_2Se$<br>SG 164 |  | 3.623                            | 3.623 | 6.655 | Hf (0.33333, 0.66667, -0.30511)<br>N (0.33333, 0.66667, 0.36841)<br>Se (0.00000, 0.00000, 0.00000) |

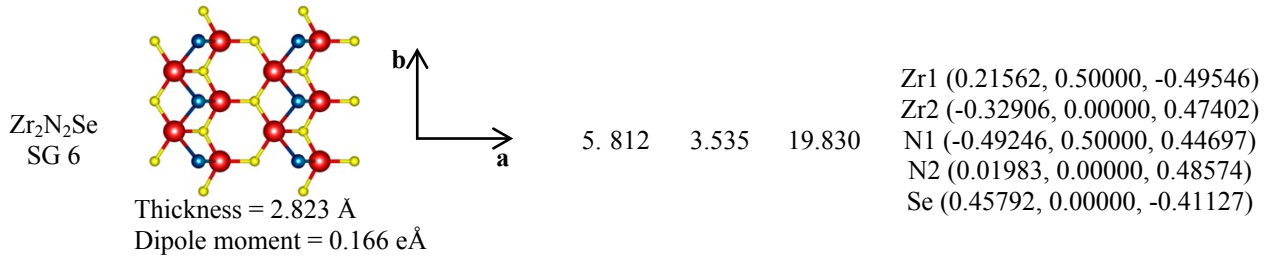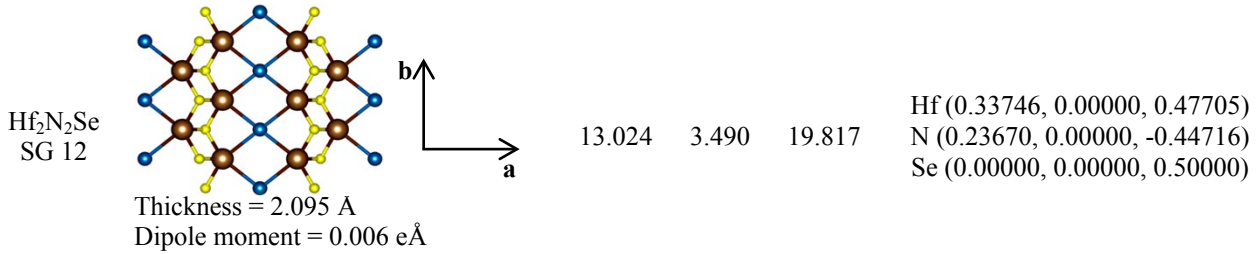

**T2** Crystallographic data of experimentally proven  $Zr_3N_3$  and  $Hf_4N_4$  phases. Red, brown and yellow spheres denote the Zr, Hf and N atoms, respectively. Refs [1-2] indicate their experimentally verified crystal class and lattice constants.

| Phase                                | Unit cell structure                                                                 | Lattice parameters / Å             | Wyckoff position                                                |
|--------------------------------------|-------------------------------------------------------------------------------------|------------------------------------|-----------------------------------------------------------------|
| $Fm\bar{3}m$ - $Zr_3N_3$<br>(SG 225) | 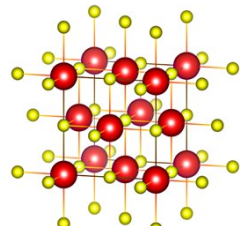  | $a = 4.59537$<br>$a = 4.56750$ [1] | Zr (0.00000, 0.00000, 0.00000)<br>N (0.50000, 0.50000, 0.50000) |
| $Fm\bar{3}m$ - $Hf_4N_4$<br>(SG 225) |  | $a = 4.53684$<br>$a = 4.53000$ [2] | Hf (0.50000, 0.50000, 0.50000)<br>N (0.00000, 0.00000, 0.00000) |

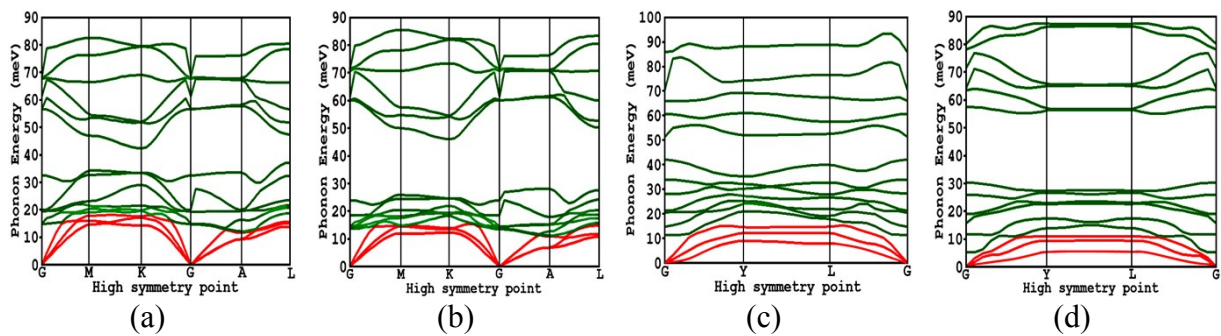

**S2** Phonon dispersion curve for (a)  $P\bar{3}m1$ - $Zr_2N_2Se$ , (b)  $P\bar{3}m1$ - $Hf_2N_2Se$ , (c)  $P1m1$ - $Zr_2N_2Se$  and (d)  $C2/m$ - $Hf_2N_2Se$ .

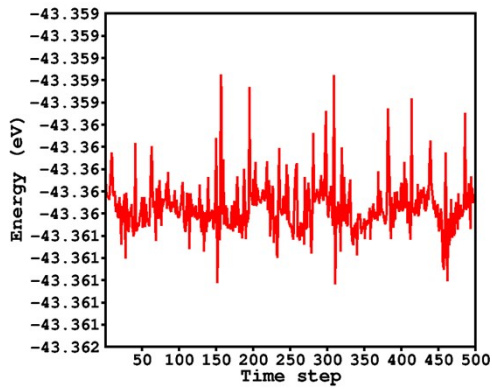

(a)

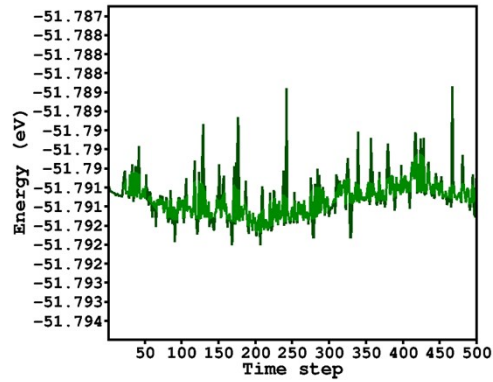

(b)

S3 Energy profiles for (a) P1m1-Zr<sub>2</sub>N<sub>2</sub>Se and (b) C2/m-Hf<sub>2</sub>N<sub>2</sub>Se during AIMD simulations at 300 K. Instability of structures is not observed.

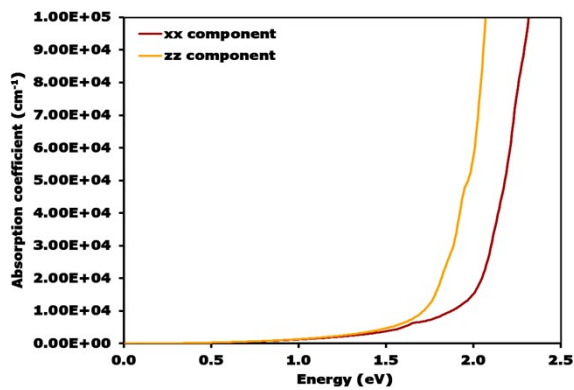

(a)

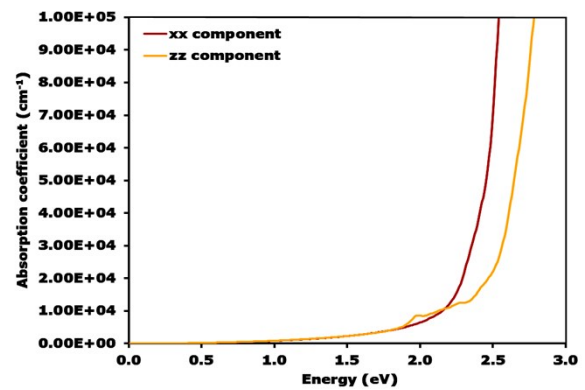

(b)

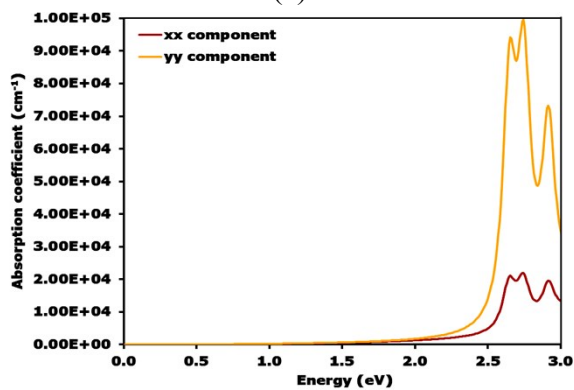

(c)

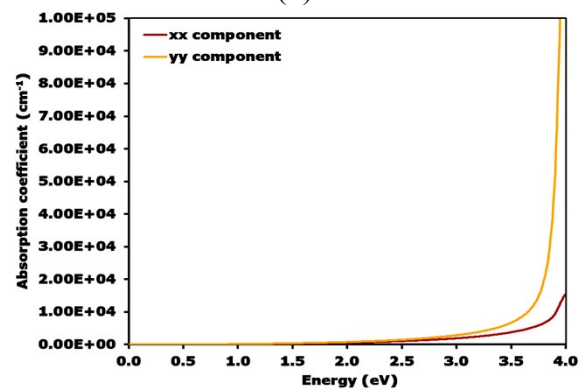

(d)

S4 Zoom-in features of absorption coefficient in the visible and infrared range for (a) P<sup>3</sup>m1-Zr<sub>2</sub>N<sub>2</sub>Se, (b) P<sup>3</sup>m1-Hf<sub>2</sub>N<sub>2</sub>Se, (c) P1m1-Zr<sub>2</sub>N<sub>2</sub>Se and (d) C2/m-Hf<sub>2</sub>N<sub>2</sub>Se.

## References

- 1) M.M.S. Sirajuddeena, I.B.S. Banu (2014). AIP Advances. 4(5), 057121.
- 2) A. Srivastava and B.D. Diwan (2014). Can. J. Phys. 92, 1058-1061.
